# Supplementary material for: Clinically Available Software for Automatic Brain Volumetry: Comparisons of Volume Measurements and Validation of Intermethod Reliability
Source: PubMed Central journal article supplement — Korean J Radiol. 2020 Nov 3;22(3):405–14. doi: 10.3348/kjr.2020.0518 (PMC7909859; doi:10.3348/kjr.2020.0518), 2020-11-03
Supplement: kjr-22-405-s001.pdf [file kjr-22-405-s001.pdf]

**Supplementary Table 1. Comparisons of Volume Obtained from NeuroQuant® and Inbrain®, Based on the Slice Thickness in Patients with MCI and AD**

|                         | With 1 mm Slice Thickness (n = 51) |                |                   | With 1.2 mm Slice Thickness (n = 76) |                |                   |
|-------------------------|------------------------------------|----------------|-------------------|--------------------------------------|----------------|-------------------|
|                         | NeuroQuant®                        | Inbrain®       | <i>P</i>          | NeuroQuant®                          | Inbrain®       | <i>P</i>          |
|                         | Mean ± SD                          | Mean ± SD      |                   | Mean ± SD                            | Mean ± SD      |                   |
| Lt cortical gray matter | 213.79 ± 21.91                     | 203.71 ± 19.62 | < 0.001           | 203.68 ± 22.74                       | 186.50 ± 22.28 | < 0.001           |
| Rt cortical gray matter | 216.31 ± 21.02                     | 203.19 ± 19.94 | < 0.001           | 205.07 ± 22.31                       | 187.41 ± 22.46 | < 0.001           |
| Lt caudate              | 2.93 ± 0.73                        | 3.45 ± 0.64    | < 0.001           | 2.82 ± 0.77                          | 3.15 ± 0.53    | < 0.001           |
| Rt caudate              | 2.99 ± 0.74                        | 3.45 ± 0.58    | < 0.001           | 2.72 ± 0.74                          | 3.11 ± 0.50    | < 0.001           |
| Lt putamen              | 5.16 ± 0.77                        | 3.81 ± 0.55    | < 0.001           | 5.51 ± 0.82                          | 3.71 ± 0.61    | < 0.001           |
| Rt putamen              | 5.02 ± 0.72                        | 3.96 ± 0.53    | < 0.001           | 5.18 ± 0.67                          | 3.72 ± 0.62    | < 0.001           |
| Lt pallidum             | 0.50 ± 0.15                        | 1.74 ± 0.22    | < 0.001           | 0.39 ± 0.12                          | 1.80 ± 0.25    | < 0.001           |
| Rt pallidum             | 0.49 ± 0.13                        | 1.70 ± 0.19    | < 0.001           | 0.36 ± 0.12                          | 1.85 ± 0.29    | < 0.001           |
| Lt thalamus             | 6.86 ± 0.67                        | 6.09 ± 0.66    | < 0.001           | 7.04 ± 0.74                          | 6.22 ± 0.71    | < 0.001           |
| Rt thalamus             | 6.78 ± 0.77                        | 5.78 ± 0.61    | < 0.001           | 7.10 ± 0.78                          | 6.10 ± 0.78    | < 0.001           |
| Lt amygdala             | 1.39 ± 0.26                        | 1.13 ± 0.28    | < 0.001           | 1.35 ± 0.24                          | 1.13 ± 0.20    | < 0.001           |
| Rt amygdala             | 1.35 ± 0.26                        | 1.31 ± 0.30    | 0.07 <sup>†</sup> | 1.28 ± 0.23                          | 1.31 ± 0.24    | 0.09 <sup>†</sup> |
| Lt hippocampus          | 3.22 ± 0.67                        | 3.48 ± 0.56    | < 0.001           | 2.91 ± 0.50                          | 3.28 ± 0.42    | < 0.001           |
| Rt hippocampus          | 3.25 ± 0.68                        | 3.51 ± 0.59    | < 0.001           | 2.97 ± 0.53                          | 3.31 ± 0.46    | < 0.001           |
| Lt cerebellum           | 60.60 ± 4.92                       | 60.64 ± 5.28   | 0.88 <sup>†</sup> | 60.01 ± 5.76                         | 60.77 ± 5.98   | < 0.001           |
| Rt cerebellum           | 58.73 ± 4.49                       | 59.26 ± 5.08   | 0.05 <sup>†</sup> | 58.88 ± 5.67                         | 59.75 ± 6.01   | < 0.001           |
| Cerebral gray matter*   | 430.35 ± 42.64                     | 406.90 ± 39.33 | < 0.001           | 403.49 ± 63.41                       | 373.91 ± 44.43 | < 0.001           |
| Cerebral white matter*  | 424.98 ± 46.80                     | 400.51 ± 40.28 | < 0.001           | 452.34 ± 55.25                       | 458.69 ± 80.95 | 0.38 <sup>†</sup> |

The units are mL. \*Cerebral gray matter and white matter mean volume measured in both hemisphere, <sup>†</sup>Statistically not significant. AD = Alzheimer's disease, Lt = left, MCI = mild cognitive impairment, Rt = right, SD = standard deviation
