# Supplementary material for: Clinically Available Software for Automatic Brain Volumetry: Comparisons of Volume Measurements and Validation of Intermethod Reliability
Source: PubMed Central journal article supplement — Korean J Radiol. 2020 Nov 3;22(3):405–14. doi: 10.3348/kjr.2020.0518 (PMC7909859; doi:10.3348/kjr.2020.0518), 2020-11-03
Supplement: kjr-22-405-s002.pdf [file kjr-22-405-s002.pdf]

**Supplementary Table 2. Results of Pearson's Correlation, ICC and Effect Size, Based on the Slice Thickness in Patients with MCI and AD**

|                         | With 1 mm Slice Thickness (n = 51) |                   |       |                   |             | With 1.2 mm Slice Thickness (n = 76) |                   |       |                   |             |
|-------------------------|------------------------------------|-------------------|-------|-------------------|-------------|--------------------------------------|-------------------|-------|-------------------|-------------|
|                         | <i>r</i>                           | <i>P</i>          | ICC   | <i>P</i>          | Effect Size | <i>r</i>                             | <i>P</i>          | ICC   | <i>P</i>          | Effect Size |
| Lt cortical gray matter | 0.90                               | < 0.001           | 0.95  | < 0.001           | 0.49        | 0.82                                 | < 0.001           | 0.90  | < 0.001           | 0.76        |
| Rt cortical gray matter | 0.93                               | < 0.001           | 0.96  | < 0.001           | 0.64        | 0.82                                 | < 0.001           | 0.90  | < 0.001           | 0.79        |
| Lt caudate              | 0.81                               | < 0.001           | 0.89  | < 0.001           | 0.76        | 0.78                                 | < 0.001           | 0.85  | < 0.001           | 0.50        |
| Rt caudate              | 0.85                               | < 0.001           | 0.91  | < 0.001           | 0.69        | 0.80                                 | < 0.001           | 0.85  | < 0.001           | 0.62        |
| Lt putamen              | 0.80                               | < 0.001           | 0.87  | < 0.001           | 2.01        | 0.71                                 | < 0.001           | 0.81  | < 0.001           | 2.49        |
| Rt putamen              | 0.89                               | < 0.001           | 0.92  | < 0.001           | 1.68        | 0.73                                 | < 0.001           | 0.84  | < 0.001           | 2.26        |
| Lt pallidum             | -0.07                              | 0.65 <sup>†</sup> | -0.13 | 0.67 <sup>†</sup> | 6.59        | -0.15                                | 0.20 <sup>†</sup> | -0.27 | 0.85 <sup>†</sup> | 7.19        |
| Rt pallidum             | 0.02                               | 0.91 <sup>†</sup> | 0.03  | 0.46 <sup>†</sup> | 7.43        | -0.23                                | 0.04              | -0.40 | 0.93 <sup>†</sup> | 6.71        |
| Lt thalamus             | 0.76                               | < 0.001           | 0.86  | < 0.001           | 1.16        | 0.73                                 | < 0.001           | 0.85  | < 0.001           | 1.12        |
| Rt thalamus             | 0.83                               | < 0.001           | 0.89  | < 0.001           | 1.44        | 0.76                                 | < 0.001           | 0.87  | < 0.001           | 1.28        |
| Lt amygdala             | 0.93                               | < 0.001           | 0.96  | < 0.001           | 0.96        | 0.80                                 | < 0.001           | 0.88  | < 0.001           | 1.00        |
| Rt amygdala             | 0.91                               | < 0.001           | 0.95  | < 0.001           | 0.14        | 0.89                                 | < 0.001           | 0.94  | < 0.001           | 0.13        |
| Lt hippocampus          | 0.88                               | < 0.001           | 0.93  | < 0.001           | 0.42        | 0.78                                 | < 0.001           | 0.87  | < 0.001           | 0.80        |
| Rt hippocampus          | 0.95                               | < 0.001           | 0.97  | < 0.001           | 0.41*       | 0.88                                 | < 0.001           | 0.93  | < 0.001           | 0.69        |
| Lt cerebellum           | 0.94                               | < 0.001           | 0.97  | < 0.001           | 0.01        | 0.95                                 | < 0.001           | 0.98  | < 0.001           | 0.13        |
| Rt cerebellum           | 0.93                               | < 0.001           | 0.96  | < 0.001           | 0.11        | 0.95                                 | < 0.001           | 0.97  | < 0.001           | 0.15        |
| Cerebral gray matter*   | 0.92                               | < 0.001           | 0.96  | < 0.001           | 0.57        | 0.70                                 | < 0.001           | 0.79  | < 0.001           | 0.54        |
| Cerebral white matter*  | 0.92                               | < 0.001           | 0.96  | < 0.001           | 0.56        | 0.63                                 | < 0.001           | 0.74  | < 0.001           | 0.09        |

\*Cerebral gray matter and white matter mean volume measured in both hemisphere, <sup>†</sup>Statistically not significant. ICC = intraclass correlation, *r* = Pearson correlation coefficient
